# Supplementary material for: MTOPVIB interacts with AtPRD1 and plays important roles in formation of meiotic DNA double-strand breaks in Arabidopsis
Source: PubMed Central journal article supplement (PMC5577129; doi:10.1038/s41598-017-10270-9), 2017-08-30
Supplement: 41598_2017_10270_MOESM1_ESM.pdf [file 41598_2017_10270_MOESM1_ESM.pdf]

**MTOPVIB interacts with AtPRD1 and plays important roles in formation of meiotic DNA double-strand breaks in *Arabidopsis***

Yu Tang<sup>1</sup>, Zhongnan Yin<sup>1</sup>, Yuejuan Zeng<sup>1</sup>, Qinxin Zhang<sup>1</sup>,  
Liqun Chen<sup>1</sup>, Yan He<sup>2</sup>, Pingli Lu<sup>3</sup>, De Ye<sup>1</sup> and Xueqin  
Zhang<sup>1\*</sup>

<sup>1</sup>State Key Laboratory of Plant Physiology and Biochemistry, College of Biological Sciences, China Agricultural University, Beijing 100193, China

<sup>2</sup>College of Agriculture and Biotechnology, China Agricultural University, Beijing 100193, China

<sup>3</sup>School of Life Sciences, Fudan University, Shanghai 200433, China

\* corresponding author: [kouyang@cau.edu.cn](mailto:kouyang@cau.edu.cn)

# Supplementary Information

**Table S1.** Genetic analysis of *mtopVIB-2* mutant.

| Crosses<br>(Female x Male)          | Number of SD <sup>R</sup><br>seedlings | Number of SD <sup>S</sup><br>seedlings | SD <sup>R</sup> /SD <sup>S</sup> |
|-------------------------------------|----------------------------------------|----------------------------------------|----------------------------------|
| <i>mtopVIB-2</i> /+ self-pollinated | 1869                                   | 645                                    | 2.90                             |
| <i>mtopVIB-2</i> /+ × Wild-type     | 652                                    | 681                                    | 0.96                             |
| Wild-type × <i>mtopVIB-2</i> /+     | 1410                                   | 1449                                   | 0.97                             |

SD<sup>R</sup>, Sulfadiazine-resistant; SD<sup>S</sup>, Sulfadiazine-sensitive.

**Table S2.** The interactions of AtPRD1, MTOPVIB, AtSPO11-1, AtSPO11-2 and AtPRD3, AtDFO.

| BD \ AD              | pGBKT7 | MTOPVIB | AtSPO11-1 | AtSPO11-2 | AtSPO11-2<br>(1-210) | AtSPO11-2<br>(170-383) | AtPRD3 | AtDFO | AtPRD1 | AtPRD1<br>(1-821) | AtPRD1<br>(775-1330) |
|----------------------|--------|---------|-----------|-----------|----------------------|------------------------|--------|-------|--------|-------------------|----------------------|
| pGADT7               | ×      | ×       | ×         | ×         | ×                    | ×                      | ×      | ×     | ×      | ×                 | ×                    |
| MTOPVIB              | ×      | ×       | √√        | ×         | √√                   | ×                      | ×      | ×     | ×      | ×                 | ×                    |
| AtSPO11-1            | ×      | √√      | ×         | ×         | ×                    | ×                      | ×      | ×     | ×      | √√                | ×                    |
| AtSPO11-2            | ×      | ×       | ×         | ×         | ×                    | ×                      | ×      | ×     | ×      | ×                 | ×                    |
| AtPRD3               | ×      | ×       | ×         | ×         | ×                    | ×                      | √√     | ×     | ×      | ×                 | ×                    |
| AtDFO                | ×      | ×       | ×         | ×         | ×                    | ×                      | ×      | ×     | ×      | ×                 | ×                    |
| AtPRD1               | ×      | √√      | ×         | ×         | ×                    | ×                      | ×      | ×     | ×      | ×                 | ×                    |
| AtPRD1<br>(1-821)    | ×      | √√      | ×         | ×         | ×                    | √√                     | √      | √     | √√     | √√                | ×                    |
| AtPRD1<br>(775-1330) | ×      | ×       | ×         | ×         | ×                    | ×                      | ×      | ×     | ×      | ×                 | ×                    |

The yeast two-hybrid assay showed that: (1) MTOPVIB interacted with AtSPO11-1; (2) MTOPVIB interacted with AtSPO11-12(1-210); (3) AtPRD1 interacted with MTOPVIB; (4) AtPRD1 (1-821 aa) interacted with AtSPO11-2 (170-383 aa); (5) AtPRD3 interacted with itself; (6) AtPRD1 (1-821 aa) interacted with AtPRD3 and AtDFO. (√√) growth well, (√) growth, (×) not growth on SD/-Leu-Trp-His-Ade medium.

**Table S3.** The Y2H assay for the interaction of the truncated AtPRD1 proteins with Topo VI-like complex, AtPRD3 and AtDFO.

| BD<br>AD              | pGBKT7 | MTOPVIB | MTOPVIB<br>(1-261) | MTOPVIB<br>(228-493) | AtSPO11-1 | AtSPO11-2 | AtSPO11-2<br>(1-210) | AtSPO11-2<br>(170-383) | AtPRD3 | AtDFO | AtPRD1<br>(1-388) |
|-----------------------|--------|---------|--------------------|----------------------|-----------|-----------|----------------------|------------------------|--------|-------|-------------------|
| pGADT7                | ×      | ×       | ×                  | ×                    | ×         | ×         | ×                    | ×                      | ×      | ×     | ×                 |
| PRD1-A(1-388)         | ×      | √√      | √√                 | ×                    | √√        | ×         | ×                    | √√                     | √√     | √     | √√                |
| PRD1-B(389-812)       | ×      | ×       | ×                  | ×                    | ×         | ×         | ×                    | ×                      | ×      | ×     | ×                 |
| PRD1-C(813-962)       | ×      | ×       | ×                  | ×                    | ×         | ×         | ×                    | ×                      | ×      | ×     | ×                 |
| PRD1-D(963-1109)      | ×      | √       | √                  | ×                    | ×         | ×         | ×                    | ×                      | √      | √     | √                 |
| PRD1-E<br>(1110-1330) | ×      | ×       | ×                  | ×                    | ×         | ×         | ×                    | ×                      | ×      | ×     | ×                 |

The yeast two-hybrid assay showed that truncated proteins, AtPRD1-A (1-388 aa) and AtPRD1-D (963-1109 aa) could interact with MTOPVIB, AtPRD3 and AtDFO in yeast. In addition, AtPRD1-A (1-388 aa) could interact with itself, and AtPRD1-A (1-388 aa) could interact with AtSPO11-1 and AtSPO11-2 (170-383 aa). (√√) growth well, (√) growth, (×) not growth on SD/-Leu-Trp-His-Ade medium.

**Table S4.** Number of cells showing GFP signal of BiFC assay for the interaction of MTOPVIB with AtSPO11-1 and AtSPO11-2, AtPRD1 with Topo VI-like complex, AtPRD3 and AtDFO.

| Combination of interactions   | Number of cells showing GFP signal |
|-------------------------------|------------------------------------|
| <i>p35S::GFP</i>              | 41                                 |
| MTOPVIB + AtSPO11-1           | 12                                 |
| MTOPVIB + AtSPO11-2           | 13                                 |
| AtPRD1 + AtSPO11-1            | 5                                  |
| AtPRD1 + AtSPO11-2            | 5                                  |
| AtPRD1 + MTOPVIB              | 5                                  |
| AtPRD1 + AtPRD3               | 1                                  |
| AtPRD1 + AtDFO                | 2                                  |
| AtPRD1-A (1-388) + AtSPO11-1  | 5                                  |
| AtPRD1-A (1-388) + AtSPO11-2  | 7                                  |
| AtPRD1-A (1-388) + MTOPVIB    | 2                                  |
| AtPRD1-A (1-388) + AtPRD3     | 6                                  |
| AtPRD1-A (1-388) + AtDFO      | 2                                  |
| AtPRD1-A (963-1109) + MTOPVIB | 1                                  |
| AtPRD1-A (963-1109) + AtPRD3  | 1                                  |
| AtPRD1-A (963-1109) + AtDFO   | 2                                  |
| AtDFO+AtPRD3                  | 0                                  |
| AtPRD1+AtDFO+AtPRD3           | 3                                  |

The strength order of interactions: 1. MTOPVIB with AtSPO11-1 and AtSPO11-2; 2. AtPRD1 with Topo VI-like complex; 3. AtPRD1 with AtPRD3 and AtDFO. The negative control in the interaction of MTOPVIB with AtSPO11-1 and AtSPO11-2, AtPRD1 with Topo VI-like complex, AtPRD3 and AtDFO showed no GFP signals. *p35S::GFP* was used as the positive control.

**Table S5.** The sequences of the primers used in this study.

| Uses                                               | Primers              | Sequences (5'->3')                  |
|----------------------------------------------------|----------------------|-------------------------------------|
| Identification of T-DNA insertion sites            | mtopVIB-2-F          | AGTGACACAGTGCTTGAGGA                |
|                                                    | mtopVIB-2-R          | CCAGAAGGCCAACAATACCA                |
|                                                    | Atmre11-F            | AGTGGGAGAGTGCTTAGAGGC               |
|                                                    | Atmre11-R            | TACCACGTTTTGAAGTCCCAG               |
|                                                    | Atcom1-1-F           | GGTTGAGGAAGGAAAGACAGC               |
|                                                    | Atcom1-1-R           | GCGTATCTGTAACGATGCCTC               |
|                                                    | Atrad50-1-F          | TCAAAAACCTGCCCGTAGTTTG              |
|                                                    | Atrad50-1-R          | ACCTCAGTTTGAAATCCCGAG               |
|                                                    | Atrad51-F            | TTCAGGATGGTGTCTCAGAGC               |
|                                                    | Atrad51-R            | ATGCCAAGGTTGACAAGATTG               |
|                                                    | Wis-p745             | AACGTCCGCAATGTGTTATTAAGTTGTC        |
|                                                    | SAIL-LB3             | TAGCATCTGAATTTCAATAACCAATCTCGATACAC |
|                                                    | SALK_LBa1            | TGGTTCACGTAGTGGGCCATCG              |
|                                                    | GK-LB                | ATATTGACCATCATACTCATTGC             |
| Genetic mapping                                    | F2J6-F               | GCTGCTCAAATATTCTTTA                 |
|                                                    | F2J6-R               | CTCAGCGTGAGTCTAGAT                  |
|                                                    | T6C23-F              | CTTGCCTTACGATACATTTG                |
|                                                    | T6C23-R              | TGCAGCATTTTATCTAATCC                |
|                                                    | T30E16-F             | AGATGCAAATTCGAAGAAC                 |
|                                                    | T30E16-R             | GCCAGACATACTTTTCATGTG               |
|                                                    | T13D8-F              | GTTAGCTCTTCCGAGATCTG                |
|                                                    | T13D8-R              | CGGCGAGAATGATGGAAGGC                |
|                                                    | F8A5-F               | GCTCTGTTAGGTACGCCCTTTGTTACAAAC      |
|                                                    | F8A5-R               | GTGAGTAACGTGCATGTTGTTGGAATC         |
|                                                    | F23C21-F             | TTTGATTTATAACGAGAGAT                |
|                                                    | F23C21-R             | ATTGCACATATTTCTGTTTT                |
|                                                    | T7P1-F               | ATGTACCATCTTACCATTAT                |
|                                                    | T7P1-R               | GACCATTGGATTGCTAAC                  |
|                                                    | F11P17-F             | TATGCATGCTTCTCTGCATAATGA            |
|                                                    | F11P17-R             | TGCTGATGCTTTTCGGGGCTTCAAG           |
| F8K4-F                                             | GCTATTATTGTGGTCGTATT |                                     |
| F8K4-R                                             | TTGTTACATGCTTTAAGATT |                                     |
| Complementation and conformation of the transgenes | MTOPVIB-COM-F (KpnI) | GGGGTACCTGCGCCAAAGGAAAATGAAGA       |
|                                                    | MTOPVIB-COM-R (Sall) | GCGTCGACCTTGCAGGGAAAGTCACAAGA       |
|                                                    | YZ-MTOPVIB-F         | ACCGGTGTTGTTGAAAGGAA                |
|                                                    | R-1300-HindIII       | TGCAAGGCGATTAAGTTGGG                |
|                                                    | F-1300-EcoRI         | CTCCGGCTCGTATGTTGTG                 |
|                                                    | YZ-MTOPVIB-R         | ACTGGCTTTGGACAAACTAGC               |
| RT-PCR and Quantitative RT-PCR                     | RT-M TOPVIB-A-F      | AGTGACACAGTGCTTGAGGA                |
|                                                    | RT-MTOPVIB-A-R       | AAGCCAATTATCGGTGCCAC                |
|                                                    | RT-MTOPVIB-B-F       | AGTCAACTCAGCATTGCAGC                |
|                                                    | RT-MTOPVIB-B-R       | AGGAGCAGCTTCTTGGTCTT                |
|                                                    | RT-AtSPO11-1-F       | CGGTCGTTGTAGATCTGGCT                |
|                                                    | RT-AtSPO11-1-R       | TAACAATGCAGCGGTTCTGTC               |
|                                                    | RT-mtopVIB-2-F       | TTGGGATGGGTTACTCTCCG                |
|                                                    | RT-mtopVIB-2-R       | CTCCATCGTCCCTCCAAC                  |
|                                                    | F-Tubulin            | CTTCGTATTTGGTCAATCCGGTGC            |
|                                                    | R-Tubulin            | GAACATGGCTGAGGCTGTCAAGTA            |
|                                                    | QRT-MTOPVIB-F        | AGTGACACAGTGCTTGAGGA                |
|                                                    | QRT-MTOPVIB-R        | CGGAGAGTAACCCATCCCAA                |
|                                                    | QRT-AtSPO11-1-F      | TGCAGCTCTGATAAACCAAAGG              |
|                                                    | QRT-AtSPO11-1-R      | CCAATTGCACGGTCCACAAT                |
|                                                    | ACTIN2-F             | GGTAACATTGTGCTCAGTGGTGG             |
|                                                    | ACTIN2-R             | AACGACCTTAATCTTCATGCTGC             |
| Measurement of recombination frequencies           | F3P11-F              | ATGTATTTGTTGCAAAATAA                |
|                                                    | F3P11-R              | TGCACAGAAGAAAAACTA                  |
|                                                    | T16B24-F             | ATGAACGGAGTAGCTATC                  |
|                                                    | T16B24-R             | CGCGTAGAACATAATCTGTA                |
|                                                    | T26D22-F             | CACAGGCCATTGGATGTA                  |
|                                                    | T26D22-R             | TGTTAGAACCCACCATTTG                 |
|                                                    | K6M13-F              | CCTGTTCCAATGAATATG                  |
| K6M13-R                                            | TGTAGCTGCTGAGTTGTC   |                                     |

-F, forward primer; -R, reverse primer.

**Table S6.** The sequences of the primers used in Y2H and Y3H assays.

| Uses for | Primers                  | Sequences (5'->3')                                 |
|----------|--------------------------|----------------------------------------------------|
| PRD3     | Y2H-PRD3-F (NdeI)        | <u>GGAATTC</u> CATATG ATGAAGATGAATATTAACAAAGCC     |
|          | Y2H-PRD3-F (BamHI)       | <u>CGGGATCC</u> GTTAATTATTATGGGGTTACCG             |
|          | Y3H-SPO11-1-F (BamHI)    | <u>CGGGATCCGT</u> ATGGAGGGAAAATTCGCTATTTTCAG       |
|          | Y3H-SPO11-1-R (PstI)     | <u>AACTGCAG</u> TCATCAAGGAGAGCTTACTTCACGAC         |
| PRD2     | Y2H-PRD2-F (NdeI)        | <u>GGAATTC</u> CATATG ATGAGTTCAAGCGTAGCTGAAG       |
|          | Y2H-PRD2-F (EcoRI)       | <u>GGAATTC</u> TCATTCTATTTCTTGGTAGGCTAAG           |
| PRD1     | Y2H-PRD1-1-F (XmaI)      | <u>TCCCCCGGG</u> ATGTTCTTCCAACACTCACAGTTG          |
|          | Y2H-PRD1-1-R (BamHI)     | <u>CGGGATCC</u> CATGGATAAATTGTTGGAGGC              |
|          | Y2H-PRD1-2-F (SfiI)      | <u>ATGGCCATGGAGGCC</u> AACTATGCCGCAACTCTTCTAGTC    |
|          | Y2H-PRD1-2-R (BamHI)     | <u>CGGGATCC</u> CTACACGATTCTCTCTGTTTGCA            |
| SPO11-1  | Y2H-SPO11-1-F (EcoRI)    | <u>GGAATTC</u> ATGGAGGGAAAATTCGCTATTTTCAG          |
|          | Y2H-SPO11-1-R (BamHI)    | <u>CGGGATCC</u> TCAAGGAGAGCTTACTTCACGAC            |
|          | Y3H-SPO11-1-F (BamHI)    | <u>CGGGATCCGT</u> ATGGAGGGAAAATTCGCTATTTTCAG       |
|          | Y3H-SPO11-1-R (PstI)     | <u>AACTGCAG</u> TCATCAAGGAGAGCTTACTTCACGAC         |
| SPO11-2  | Y2H-SPO11-2-1-F (EcoRI)  | <u>GGAATTC</u> ATGGAGGAAAGTTCAGGACTATC             |
|          | Y2H-SPO11-2-1-R (BamHI)  | <u>CGGGATCC</u> TCAAGCATCAGTTCTCATGATGGT           |
|          | Y2H-SPO11-2-2-F (EcoRI)  | <u>GGAATTC</u> GGAAGTTATTTCTACAAGAAC               |
|          | Y2H-SPO11-2-2-R (BamHI)  | <u>CGGGATCC</u> TATGTATTTGCCTTGCACGATCTT           |
| MTOPIVIB | Y2H-MTOPIVIB-1-F (SfiI)  | <u>ATGGCCATGGAGGCC</u> ATGGAAAACAATGCTCCGGTTC      |
|          | Y2H-MTOPIVIB-1-R (BamHI) | <u>CGGGATCC</u> TATCACAATAACCACTTCCATCG            |
|          | Y2H-MTOPIVIB-2-F (SfiI)  | <u>ATGGCCATGGAGGCC</u> GTTGGAGGACGATGGAAG          |
|          | Y2H-MTOPIVIB-2-R (BamHI) | <u>CGGGATCC</u> CTATTCCTGCAGCATAGTCGCC             |
|          | Y3H-MTOPIVIB-F (BamHI)   | <u>CGGGATCCGT</u> ATGGAAAACAATGCTCCGGTTC           |
|          | Y3H-MTOPIVIB-R (Sall)    | <u>ACGCGTCGAC</u> CTATTCCTGCAGCATAGTCGCC           |
| DFO      | Y2H-DFO-F (SfiI)         | <u>ATGGCCATGGAGGCC</u> ATGCGCCATAACATAAAAATTCAAATC |
|          | Y2H-DFO-R (BamHI)        | <u>CGGGATCC</u> AAATGTAGTCAGAAGTCTGTTACAAAC        |
|          | Y2H-DFO-F (NdeI)         | <u>GGAATTC</u> CATATG ATGCGCCATAACATAAAAATTCAAATC  |
|          | Y2H-DFO-R (PstI)         | <u>AACTGCAG</u> AAATGTAGTCAGAAGTCTGTTACAAAC        |
|          | Y3H-DFO-F (BamHI)        | <u>CGGGATCCGT</u> ATGCGCCATAACATAAAAATTCAAATC      |
|          | Y3H-DFO-R (Sall)         | <u>ACGCGTCGAC</u> TCAAATGTAGTCAGAAGTCTGTTACAAAC    |
| PRD1     | Y2H-PRD1-1-F (XmaI)      | <u>TCCCCCGGG</u> ATGTTCTTCCAACACTCACAGTTG          |
|          | Y2H-PRD1-1-R (BamHI)     | <u>CGGGATCC</u> CATGGATAAATTGTTGGAGGC              |
|          | Y2H-PRD1-2-F (SfiI)      | <u>ATGGCCATGGAGGCC</u> AACTATGCCGCAACTCTTCTAGTC    |
|          | Y2H-PRD1-2-R (BamHI)     | <u>CGGGATCC</u> CTACACGATTCTCTCTGTTTGCA            |
|          | Y2H-A-PRD1-F (XmaI)      | <u>TCCCCCGGG</u> ATGTTCTTCCAACACTCACAGTTG          |
|          | Y2H-A-PRD1-R (BamHI)     | <u>CGGGATCC</u> CCAATAACAAGTCTCTTCC                |
|          | Y2H-B-PRD1-F (SfiI)      | <u>ATGGCCATGGAGGCC</u> TTTCTTCAGTCATCCGAGTGC       |
|          | Y2H-B-PRD1-R (BamHI)     | <u>CGGGATCC</u> CAACTTTGCAAACCAATATGTG             |
|          | Y2H-C-PRD1-F (NdeI)      | <u>GGAATTC</u> CATATG ATATCAGAAGGAGACAACACTATGC    |
|          | Y2H-C-PRD1-R (BamHI)     | <u>CGGGATCC</u> AATATTTCTTGAAGCTTCCACA             |
|          | Y2H-D-PRD1-F (NdeI)      | <u>GGAATTC</u> CATATG GTGTGCAATTCGTACCTGGTATC      |
|          | Y2H-D-PRD1-R (BamHI)     | <u>CGGGATCC</u> AGAGTTTGTGCTACTCTTATGTC            |
|          | Y2H-E-PRD1-F (NdeI)      | <u>GGAATTC</u> CATATG GCGCTTTGTCTTTCCATGATTTTAG    |
|          | Y2H-E-PRD1-R (BamHI)     | <u>CGGGATCC</u> CTACACGATTCTCTCTGTTTGCA            |
|          | Y3H-PRD1-A-F (NotI)      | <u>ATAAGAATGCGGCCGC</u> AATGTTCTTCCAACACTCACAG     |
|          | Y3H-PRD1-A-R (BglII)     | <u>GAAGATCT</u> CTACCAATAACAAGTCTCTTCC             |

-F, forward primer; -R, reverse primer.

**Table S7.** The sequences of the primers used in BiFC assays.

| <u>Uses</u> | Primers                  | <u>Sequences (5'→3')</u>                      |
|-------------|--------------------------|-----------------------------------------------|
| MTOPVIB     | BiFC-MTOPVIB-F (Xbal)    | <u>GCTCTAGAA</u> TGGAAAACAATGCTCCGGTTC        |
|             | BiFC-MTOPVIB-R (BamHI)   | CGGGAT <u>CCT</u> TCCTGCAGCATAGTCGCCAGAC      |
| SPO11-1     | BiFC-SPO11-1-F (Xbal)    | <u>GCTCTAGAA</u> TGGAGGGAAAATTCGCTATTTTCAG    |
|             | BiFC-SPO11-1-R (BamHI)   | CGGGAT <u>CC</u> AGGAGAGCTTACTTCACGAC         |
| SPO11-2     | BiFC-SPO11-2-F (Xbal)    | <u>GCTCTAGAA</u> TGGAGGAAAGTTCAGGACTATC       |
|             | BiFC-SPO11-2-R (BamHI)   | CGGGAT <u>CCT</u> ATGTATTTGCCTTGCACGATCTT     |
| PRD3        | BiFC-PRD3-F(BamHI)       | CGGGAT <u>CC</u> ATGAAGATGAATATTAACAAAGCC     |
|             | BiFC-PRD3-R (KpnI)       | GGGGT <u>ACCA</u> ATTATTATGGGGTTACCG          |
| DFO         | BiFC-DFO-F (BamHI)       | CGGGAT <u>CC</u> ATGCGCCATAACATAAAATTCAAATC   |
|             | BiFC-DFO-R (KpnI)        | GGGGT <u>ACCA</u> AAATGTAGTCAGAAGTCTGTTACAAAC |
| PRD3        | BiFC-PRD3-F (Xbal)       | <u>GCTCTAGAA</u> TGAAGATGAATATTAACAAAGCC      |
|             | BiFC-PRD3-R (BamHI)      | CGGGAT <u>CC</u> GTTAATTATTATGGGGTTACCG       |
| PRD1        | BiFC-PRD1-F (BamHI)      | CGGGAT <u>CC</u> ATGTTCTTCCAACACTCACAGTTG     |
|             | BiFC-PRD1-R (KpnI)       | GGGGT <u>ACCC</u> CACGATTCTCTCTGTTTGCA        |
|             | BiFC-PRD1-A-F (BamHI)    | CGGGAT <u>CC</u> ATGTTCTTCCAACACTCACAGTTG     |
|             | BiFC-PRD1-A-R (KpnI)     | GGGGT <u>ACCC</u> CCAATAACAAGTCTCTTCC         |
|             | BiFC-PRD1-D-F (BamHI)    | CGGGAT <u>CC</u> GTCGCAATTCGTACCTGGTATC       |
|             | BiFC-PRD1-D-R (KpnI)     | GGGGT <u>ACC</u> AGAGTTTGTGCGCTACTCTTATGTC    |
|             | SUPER-AtPRD1-F (ApaI)    | ATGGGGG <u>CCC</u> ATGTTCTTCCAACACTCACAGTTG   |
|             | SUPER-AtPRD1-R (SpeI)    | <u>GACTAGT</u> TGCAAACAGAGAGAATCGTG           |
| MTOPVIB     | BiFC-MTOPVIB-F (Xbal)    | <u>GCTCTAGAA</u> TGGAAAACAATGCTCCGGTTC        |
|             | BiFC-MTOPVIB-R (BamHI)   | CGGGAT <u>CCT</u> TCCTGCAGCATAGTCGCCAGAC      |
|             | BiFC-MTOPVIB-1-F (KpnI)  | GGGGT <u>ACC</u> ATGAAAACAATGCTCCGGTTC        |
|             | BiFC-MTOPVIB-1-R (BamHI) | CGGGAT <u>CC</u> GCTGCAATGCTGAGTTGACT         |
|             | BiFC-MTOPVIB-2-F (KpnI)  | GGGGT <u>ACC</u> GGAACAGTATGCCAGGAAGA         |
|             | BiFC-MTOPVIB-2-R (BamHI) | CGGGAT <u>CCT</u> TCCTGCAGCATAGTCGCC          |

-F, forward primer; -R, reverse primer.



## Figure S1.

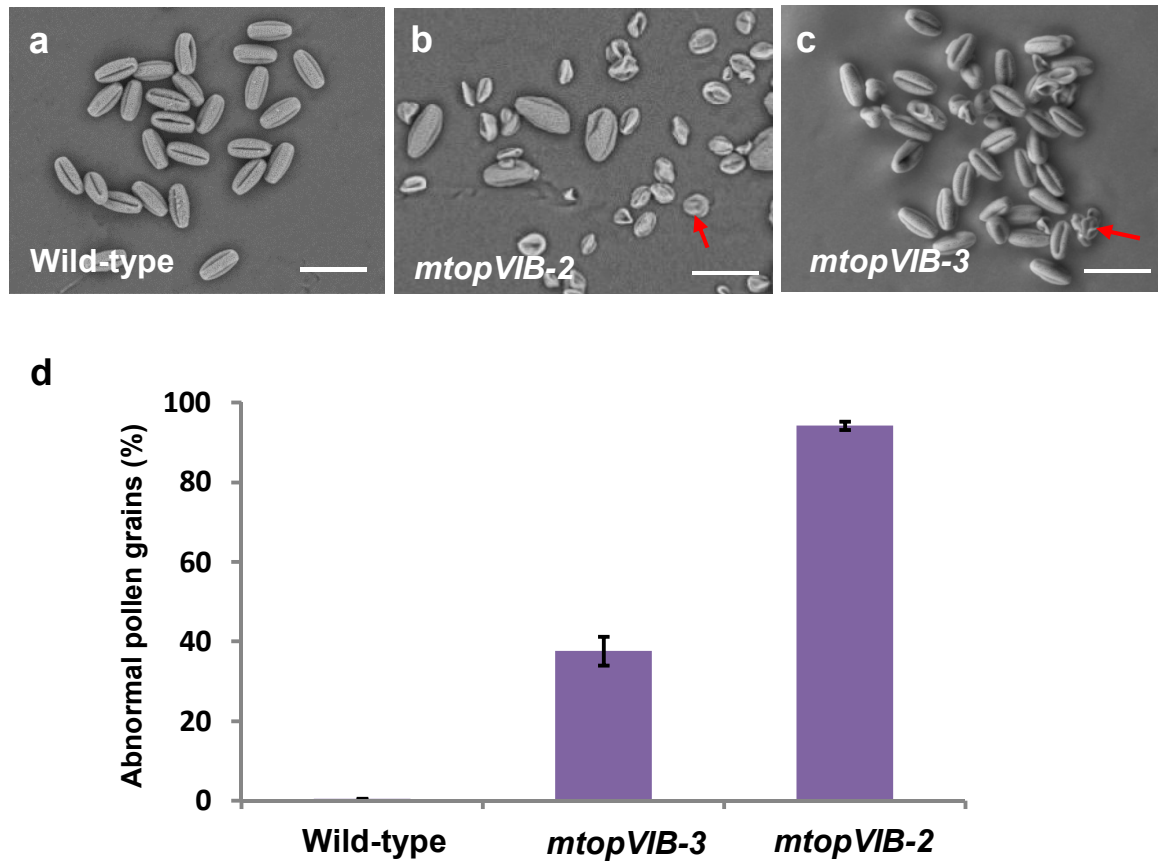

**Figure S1.** Defects of pollen grains in *mtopVIB-2* and *mtopVIB-3* mutants. (a-c) SEM images of the pollen grains from wild type (a), *mtopVIB-2* (b), and *mtopVIB-3* (c). (d) A quantitative comparison of the abnormal pollen grains in wild-type (Ler), *mtopVIB-2* and *mtopVIB-3*. The red arrows indicate the abnormal pollen grains. Bars=50  $\mu$ m in (a-c).

**Figure S2.**

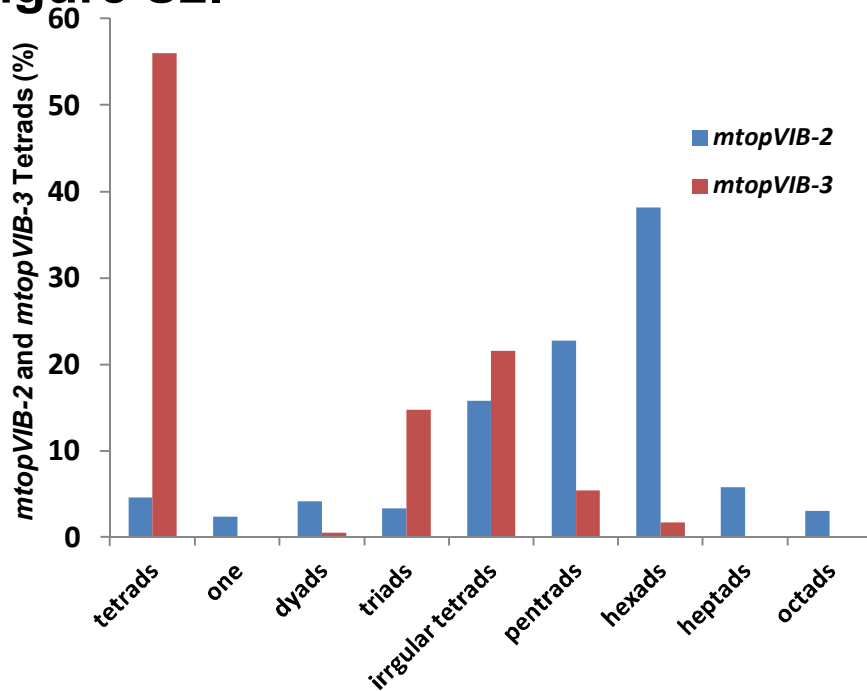

**Figure S2.** Quantitative comparison of the polyads in *mtopVIB-2* and *mtopVIB-3*.

*mtopVIB-2* had 4.6% normal tetrads, 2.4% one microspore, 4.2% dyads, 3.3% triads, 15.8% irregular tetrads, 22.7% pentrads, 38.2% hexads, 5.8% heptads and 3% octads. *mtopVIB-3* had 56% normal tetrads, 0.6% dyads, 14.8% triads, 21.6% irregular tetrads, 5.4% pentrads and 1.7% hexads.

## Figure S3.

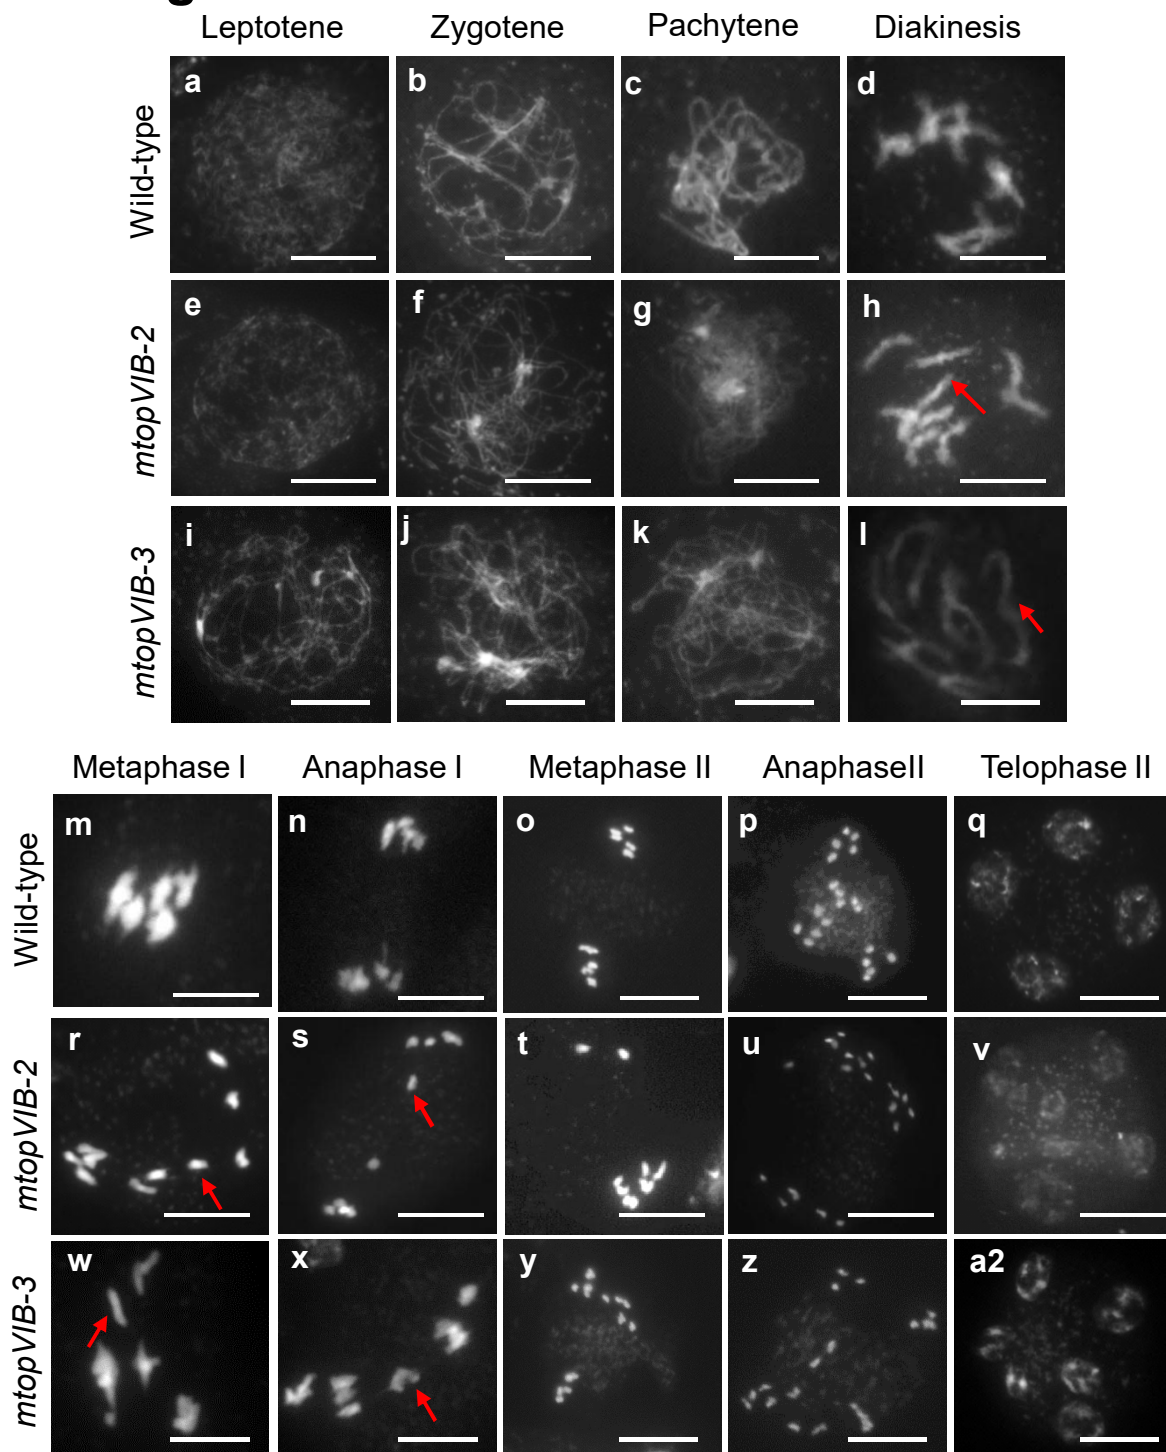

**Figure S3.** Aberrant meiosis in male meiocytes from *mtopVIB-2* and *mtopVIB-3*.

(a-d) Meiotic chromosome behaviors at the early meiotic stages in wild-type (WT) plant. (e-h) Meiotic chromosome behaviors at the early meiotic stages in *mtopVIB-2*. (i-l) Meiotic chromosome behaviors at the early meiotic stages in *mtopVIB-3*. (m-q) Meiotic chromosome behaviors at the middle and late stages in wild-type plant. (r-v) Meiotic chromosome behaviors at the middle and late stages in *mtopVIB-2*. (w-a2) Meiotic chromosome behaviors at the middle and late meiotic stages in *mtopVIB-3*. The univalents at diakinesis stage and Metaphase I and lagging chromosomes at anaphase I in *mtopVIB* mutants are indicated by red arrows. Bars=10  $\mu$ m.

## Figure S4.

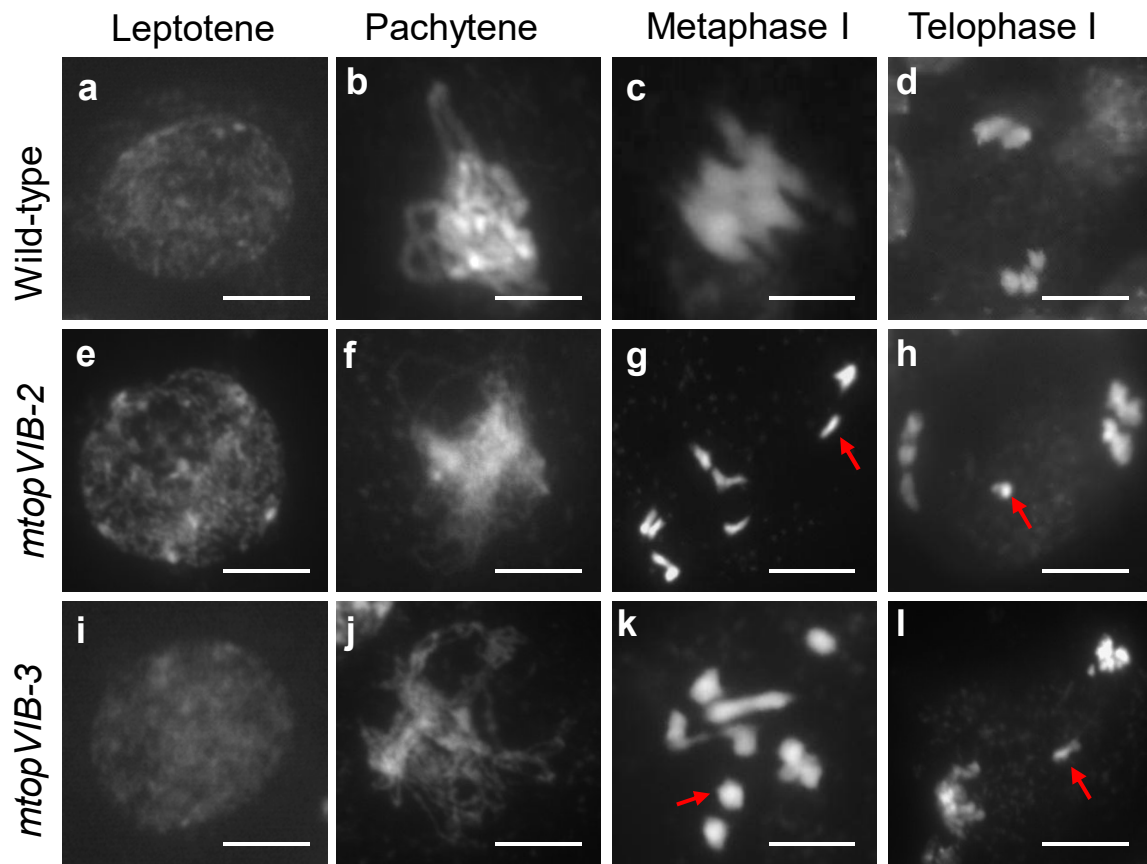

**Figure S4.** Aberrant meiosis in female meiocytes from *mtopVIB-2* and *mtopVIB-3*.

Meiotic chromosomes at the different stages in wild-type (a-d), *mtopVIB-2* (e-h), *mtopVIB-3* (i-k). The red arrows indicate the univalents at metaphase I and lagging chromosomes at telophase I in the *mtopVIB* mutants. Bars=10  $\mu$ m.

## Figure S5.

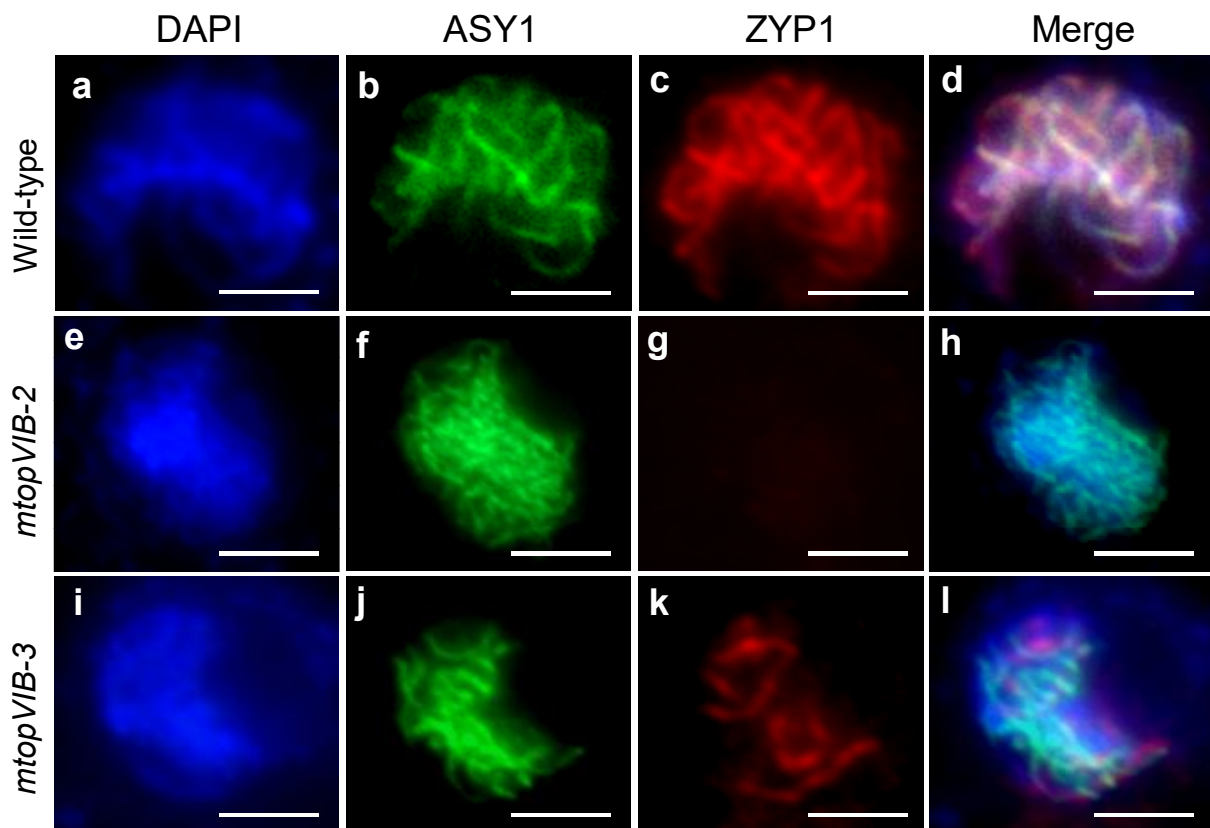

**Figure S5.** Co-immunolocalization assays of ASY1 and ZYP1 in wild-type, *mtopVIB-2* and *mtopVIB-3* meiocytes at the pachytene stages.

Co-immunolocalization of ASY1 (green) and ZYP1 (red) in the meiocytes at pachytenes in wild-type (a-d), *mtopVIB-2* (e-h) and *mtopVIB-3* (i-l). No ZYP1 signals in *mtopVIB-2* and weak ZYP1 signals in *mtopVIB-3* were observed. Bars=10  $\mu$ m.

# Figure S6.

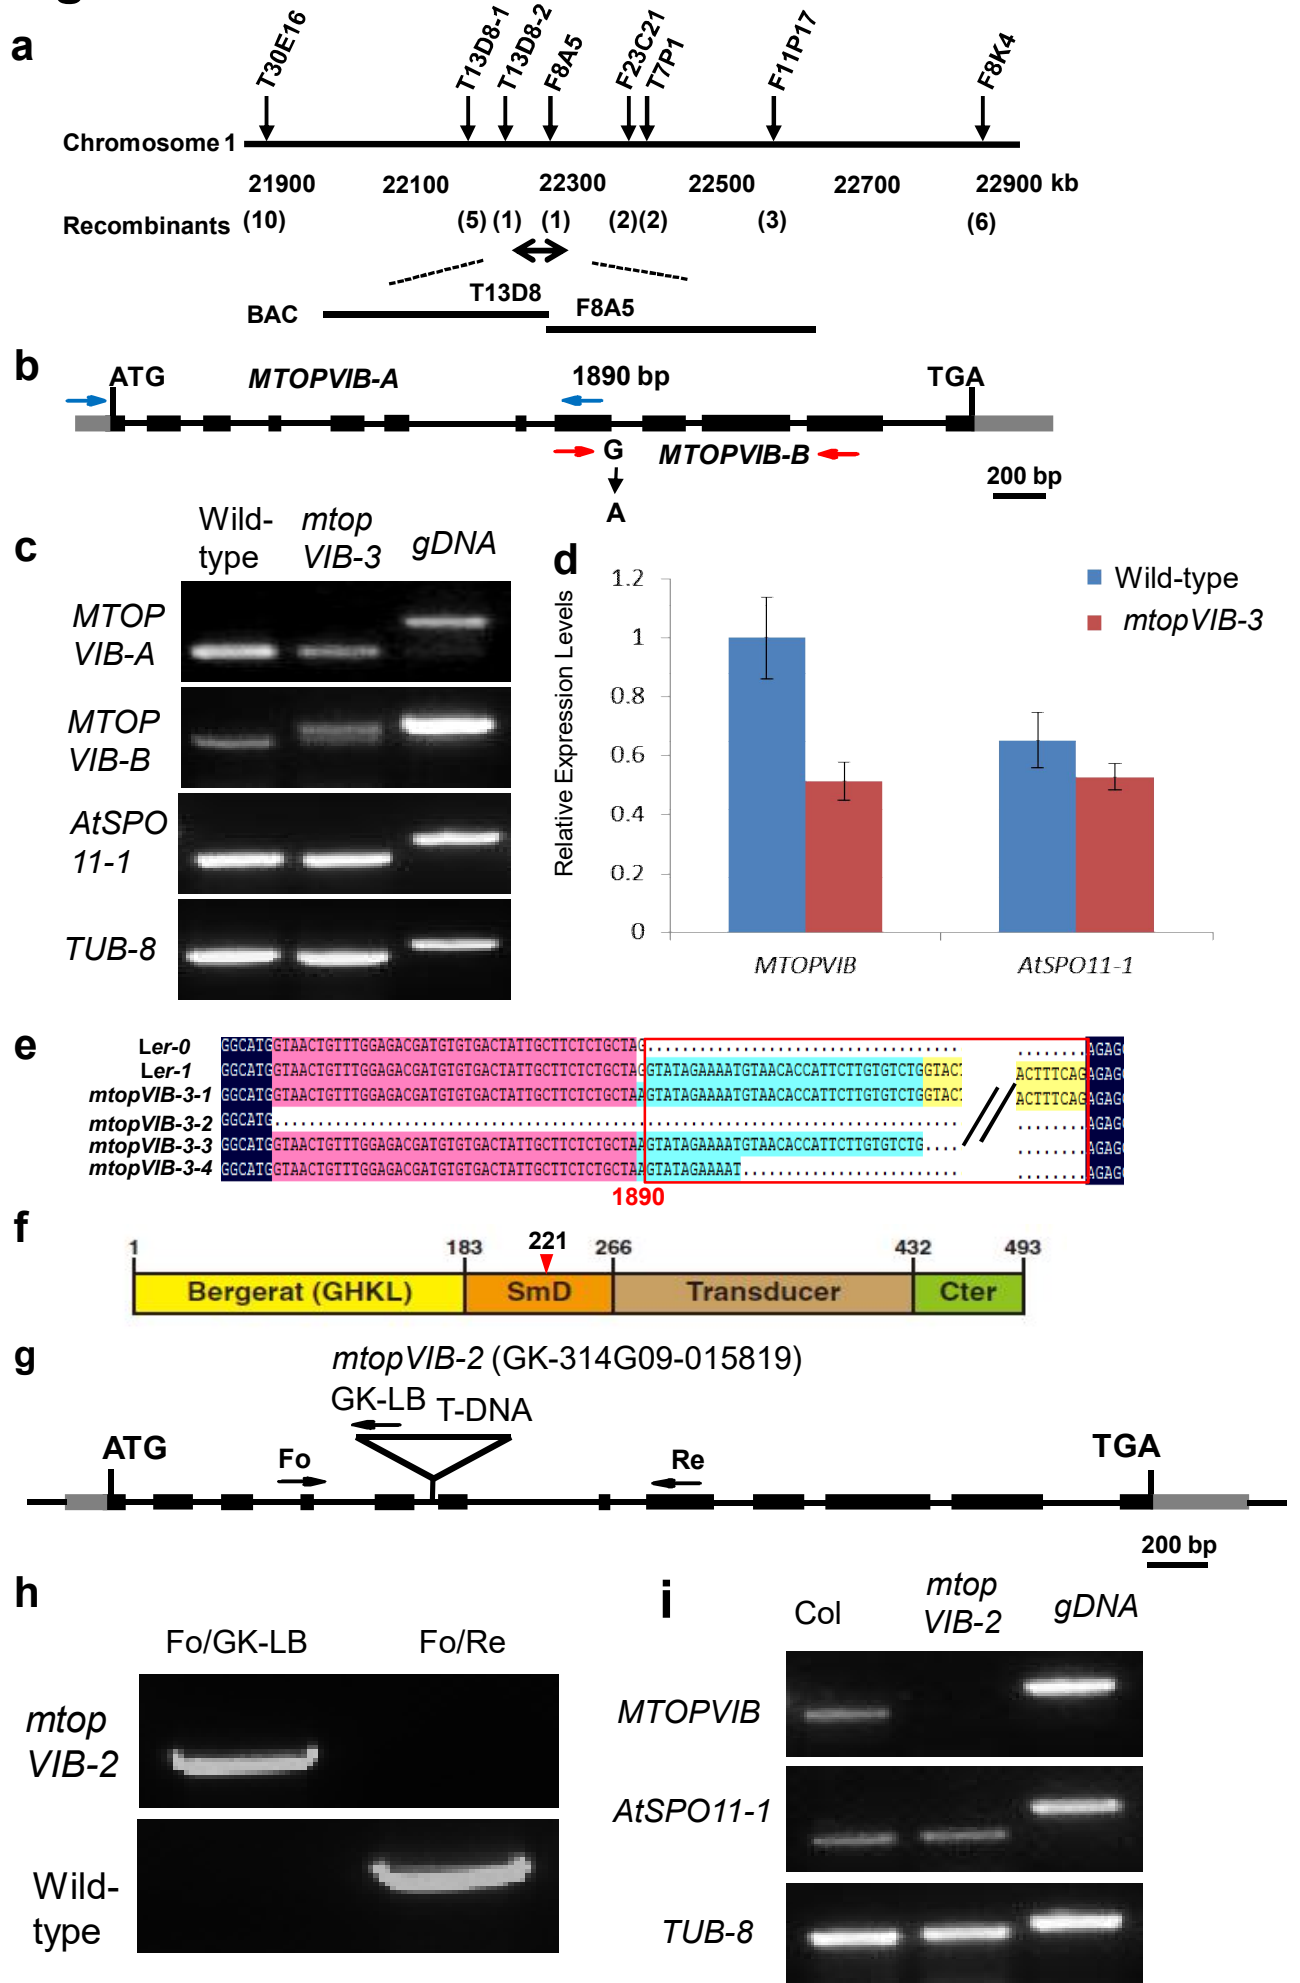

**Figure S6.** Molecular characterization of the *mtopVIB* mutants.

(a) The *mtopVIB-3* mutation was located between the BAC clones T13D8 and F8A5 on chromosome 1. (b) Sequencing revealed that *mtopVIB-3* was caused by a G-to-A mutation at the position 1890 bp downstream of the start codon ATG in *AT1G60460* (*MTOPVIB*). The two blue arrows indicated the locations of the primers used for amplification of *MTOPVIB-A* fragment. The two red arrows indicated the locations of the primers for amplification of *MTOPVIB-B* fragment. (c) A RT-PCR assay for *MTOPVIB* expression in wild-type and *mtopVIB-3* inflorescences. *AtSPO11-1* and *TUBULIN8* (*TUB-8*) were used as internal controls. (d) Relative expression levels of *MTOPVIB* in wild-type and *mtopVIB-3* plants, *ACTIN* and *AtSPO11-1* were used as internal controls. (e) Sequence alignment comparison of the *MTOPVIB* cDNA from Ler and *mtopVIB-3* using DNAMAN. *Ler-0* presented the mature product of *MTOPVIB* transcript. *Ler-1* presented the intermediate product of the *MTOPVIB* transcript. The *mtopVIB-3-1* showed that the intron behind the mutation site was remained. The *mtopVIB-3-2* had a 43 bp deletion at the position upstream of the mutation site. The *mtopVIB-3-3* and *mtopVIB-3-4* showed 32 bp- and 11 bp-remains of the intron behind the mutation, respectively. Red box indicates the position of the eight intron. The slash lines presented the omitted/abbreviated sequences of the eight intron. (f) The *mtopVIB-3* mutation led to truncation of the protein and mutation at the site of 221 aa. (g) T-DNA was inserted in the fifth intron in *mtopVIB-2* mutant. (h) Confirmation of the T-DNA insertion in *mtopVIB-2* by PCR. (i) RT-PCR assay for expression of *MTOPVIB* in wild-type (WT) and *mtopVIB-2* inflorescences. Fo and Re presented the forward and reverse gene-specific primers for T-DNA insertion and RT-PCR assays. GK-LB presented the T-DNA left border (3'-end)-specific primer. WT, wild-type.



# Figure S7.

**a**

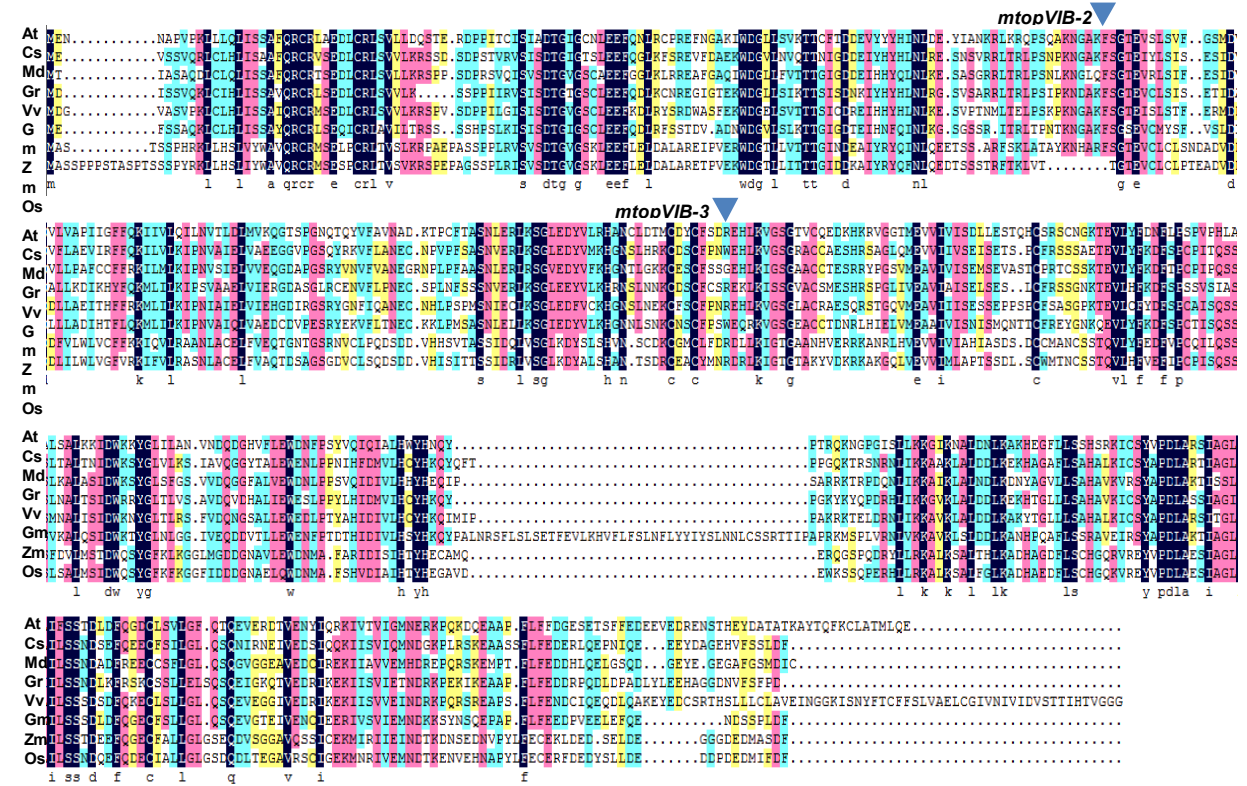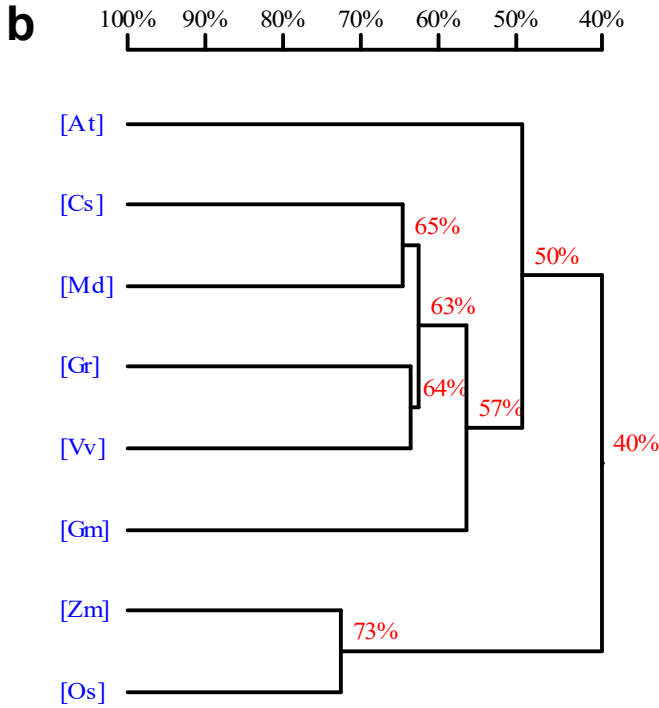



**Figure S7.** Multiple sequence alignment of MTOPVIB and its homologs in plants.

(a) MTOPVIB was aligned with the seven MTOPVIB homologs from other species. The arrows indicated the mutation sites in *mtopVIB-2* and *mtopVIB-3*. (b) A phylogenetic tree of MTOPVIB and the homologs in plants. At, *Arabidopsis thaliana* (MTOPVIB); Cs, *Citrus sinensis*, XP\_006484319.1; Gm, *Glycine max* (XP\_006607066.1); Gr, *Gossypium raimondii* (KJB65545.1); Md, *Malus domestica* (P\_008353023.1); Mt, *Cucumis melo* (XP\_008444327.1); Os, *Oryza sativa* (EEE66334.1); Vv, *Vitis vinifera* (XP\_010651436.1); Zm, *Zea mays* (XP\_008645058.1).

**Figure S8.**

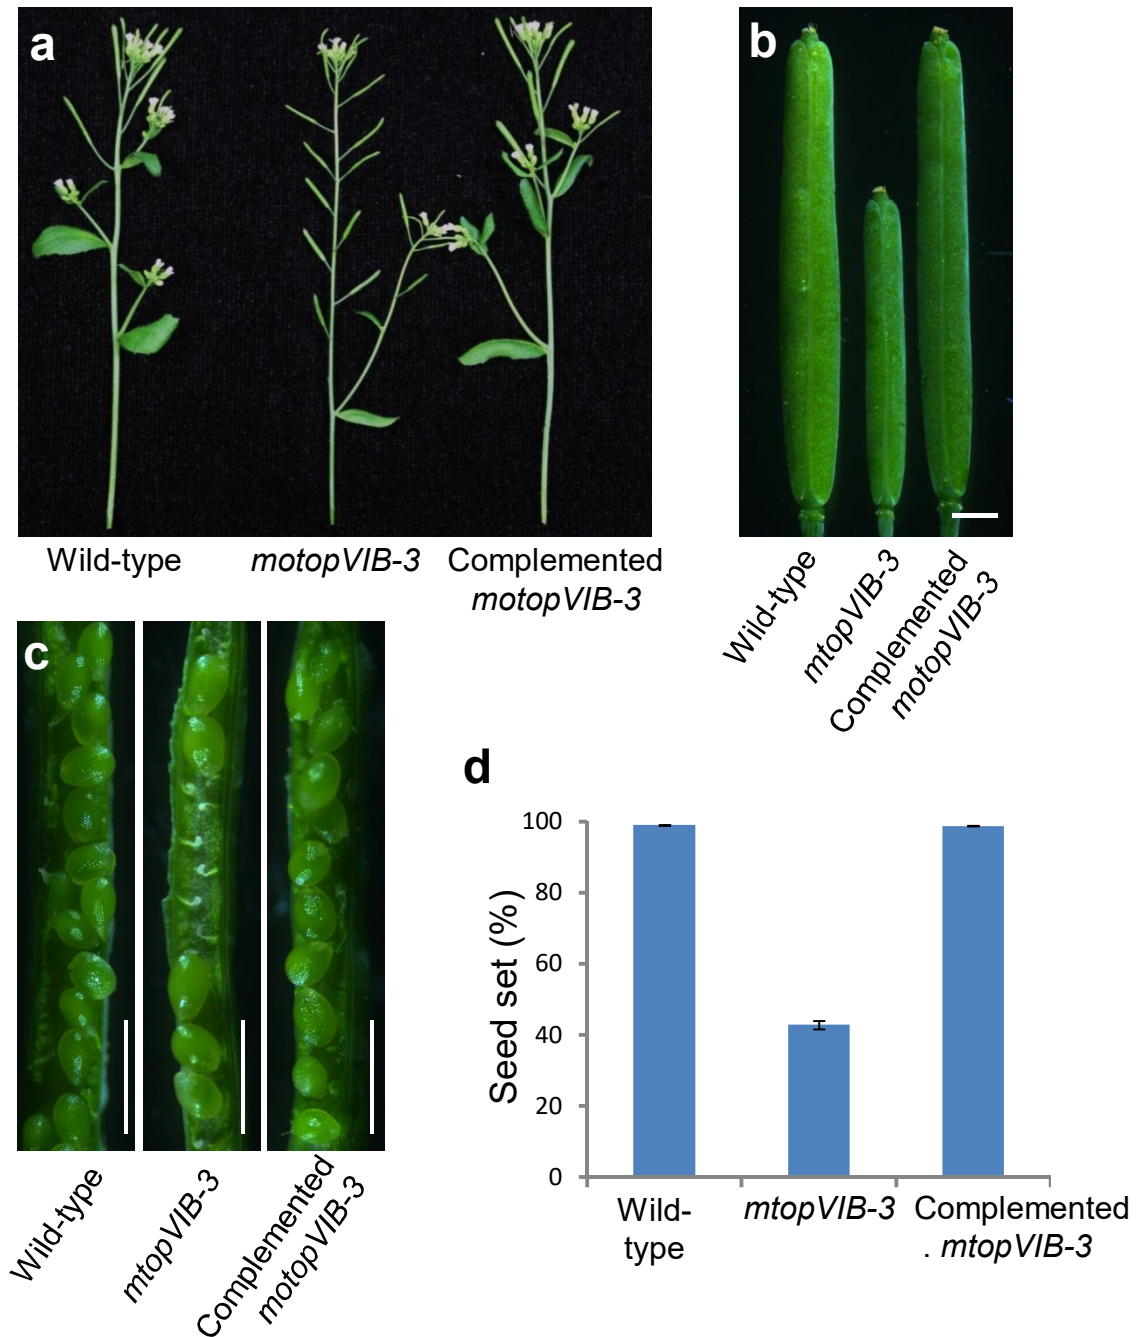

**Figure S8.** Complementation of the *mtopVIB-3* mutant phenotype.

(a) The inflorescences from wild-type, *mtopVIB-3* and complemented *mtopVIB-3* plants. (b) The siliques from wild-type, *mtopVIB-3* and complemented *mtopVIB-3* plants. (c) The seed sets in siliques from wild-type, *mtopVIB-3* and complemented *mtopVIB-3* plants. (d) A quantitative comparison of seed-set rates in the siliques from wild-type, *mtopVIB-3* and complemented *mtopVIB-3* plants. Bars=2 mm.

## Figure S9.

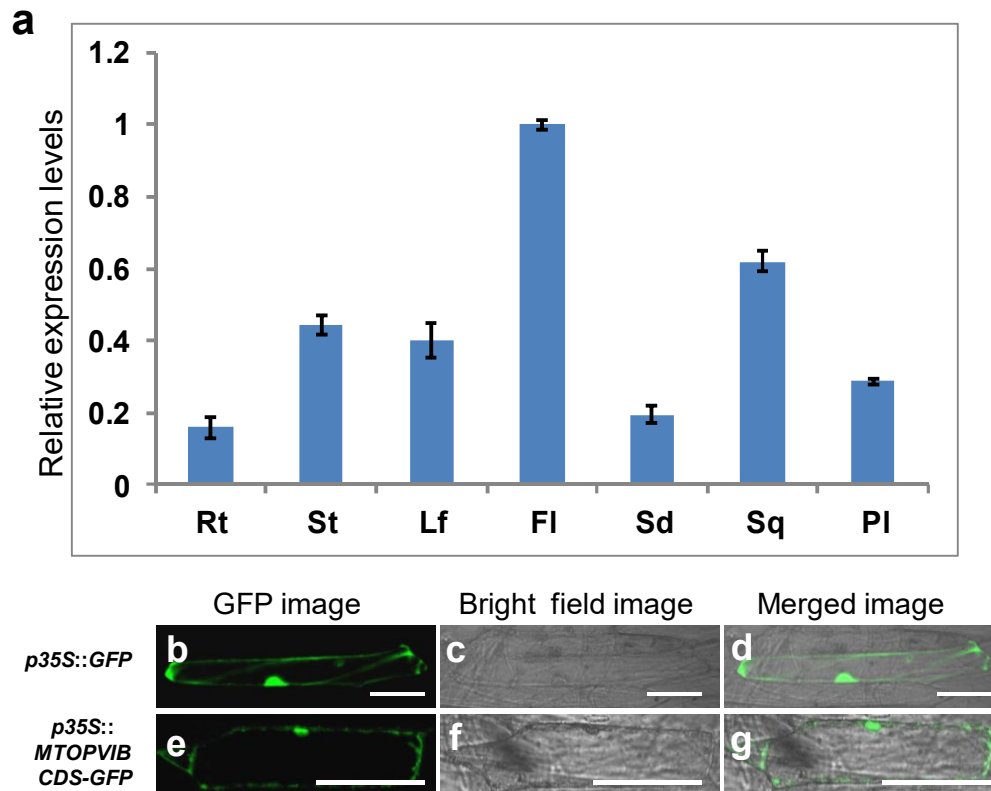

**Figure S9.** The characterization of *MTOPVIB*.

(a) A qRT-PCR assay for the relative expression levels of *MTOPVIB* in different tissues from wild-type plants. (b-l) Transient expression of green fluorescent protein (GFP) under control of 35S promoter in an onion epidermal cell was used as a control, showing that the GFP protein was distributed in the whole cell. (e-g) Transient expression of GFP-MTOPOVIB under 35S promoter in an onion epidermal cell, showing that the MTOPOVIB was localized in the nucleus and cytoplasm. Fl, flower; Lf, leaf; PI, pollen; Rt, root; Sd, seedling; Sq, silique; St, stem. Bars=1 00  $\mu$ m.

## Figure S10.

**a**

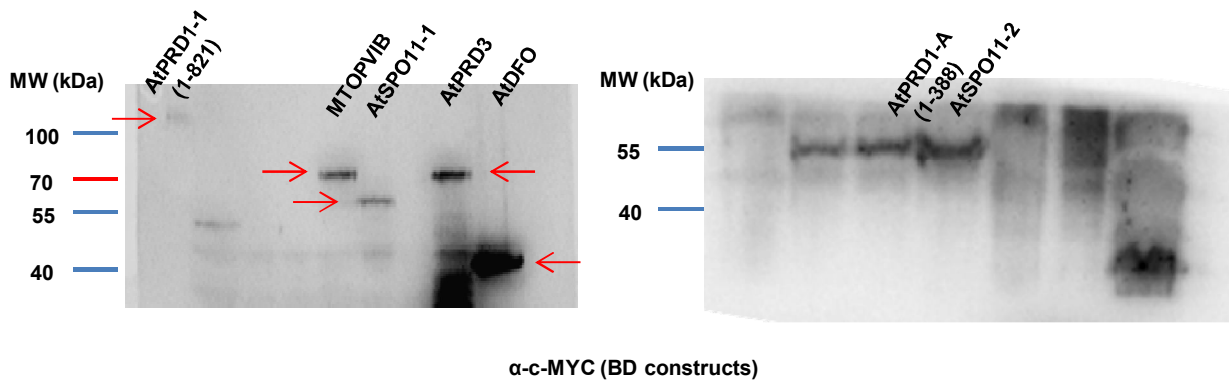

**b**

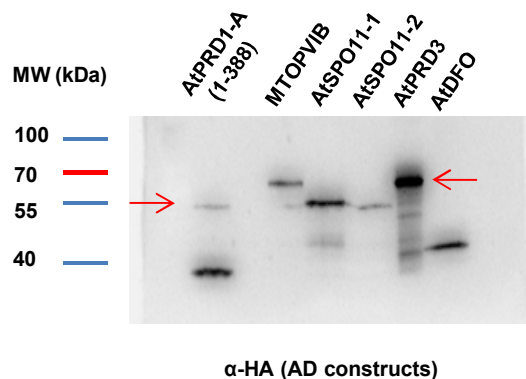

**Figure S10.** Western blot analysis of recombinant protein expression in yeast cells. Expression of MTOPVIB, SPO11-1, SPO11-2, AtPRD1, AtPRD3 and AtDFO was examined by western blot. BD recombinant proteins with anti-c-Myc antibody (a) and AD recombinant proteins were detected with anti-HA antibody (b). BD recombinant proteins and AD recombinant proteins were showed the full-length blot in (a) and (b), respectively.

AtPRD1-1 (1-821)=107 kDa; AtPRD1-A (1-388)=56 kDa; MTOPVIB=70 kDa; AtPRD3=69 kDa; AtSPO11-1=55 kDa; AtSPO11-2=56 kDa; AtDFO=40 kDa. Red arrows pointed in lanes are the target proteins. MW: Prestained Protein Ladder.

# Figure S11.

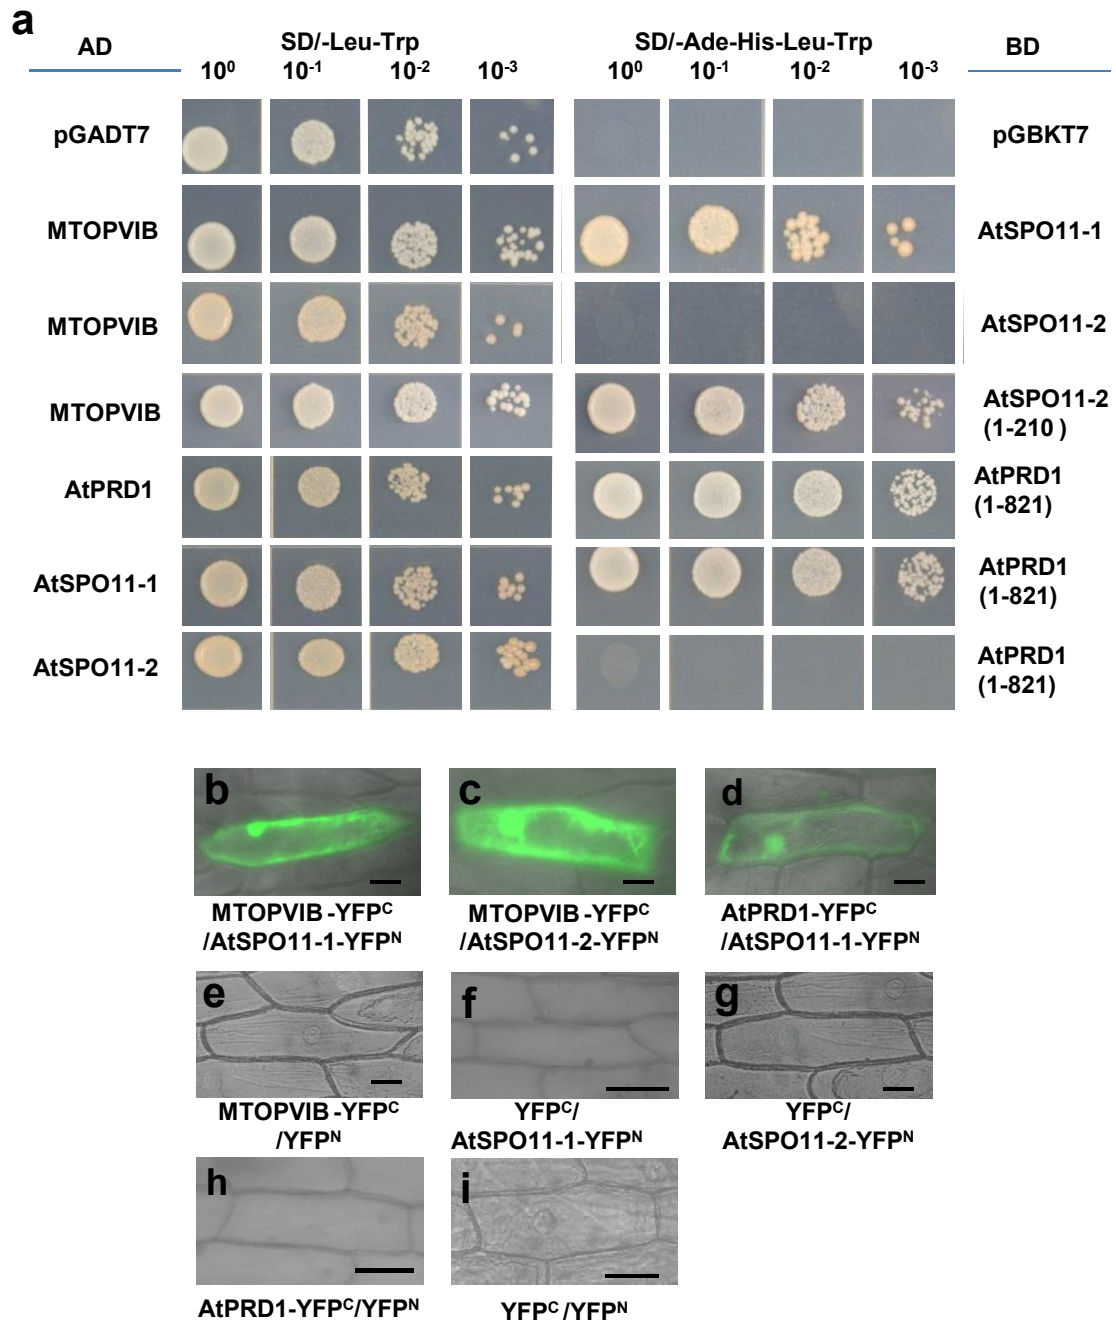

**Figure S11.** MTOPVIB interacted with AtSPO11-1 and AtSPO11-2, AtPRD1 interacted with AtSPO11-1 .

(a) The yeast two-hybrid assay showed that MTOPVIB interacted with AtSPO11-1 and AtSPO11-2 (1-210 aa), AtPRD1 (1-821 aa) interacted with AtSPO11-1 and itself. (b-i) Bimolecular fluorescence complementation assays showed interactions of MTOPVIB with AtSPO11-1 (b) and AtSPO11-2 (c), AtPRD1 with AtSPO11-1 (d) in onion epidermal cells. (e-i) The negative controls for (b-d). Bars=50  $\mu$ m.

## Figure S12.

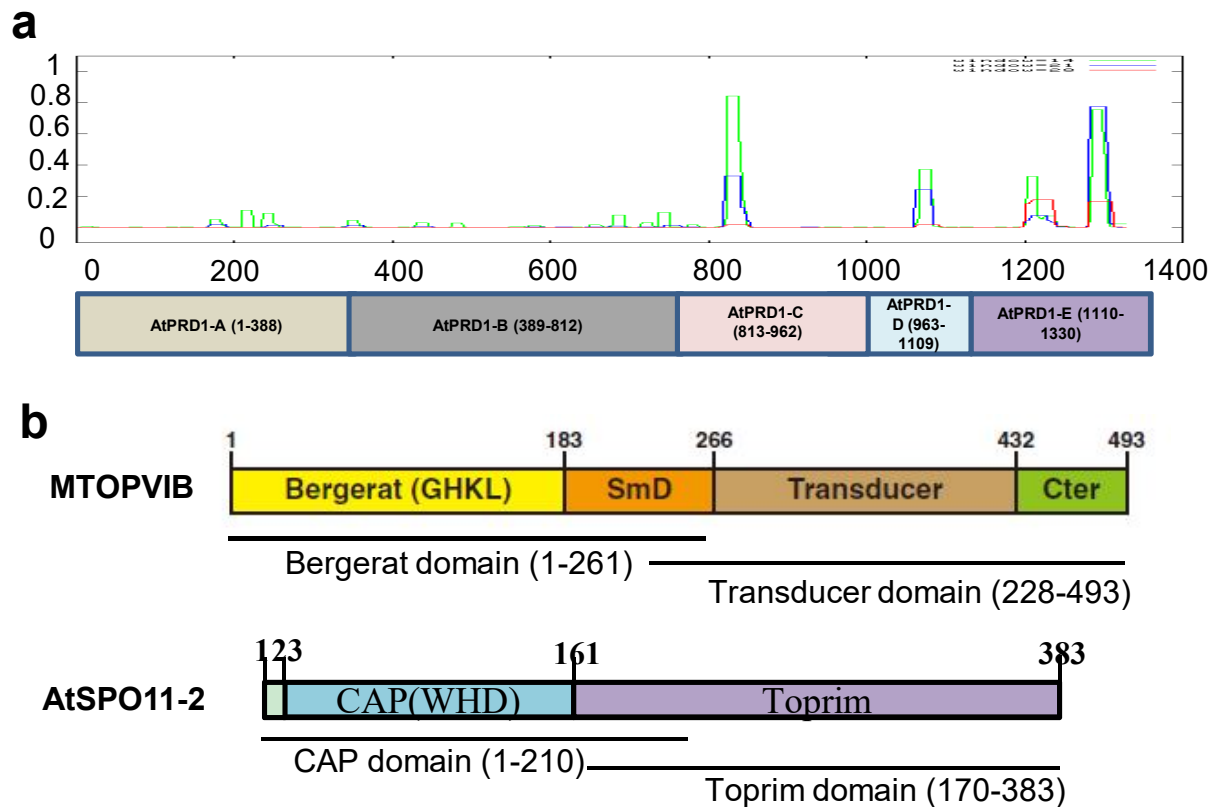

**Figure S12.** The structural characteristics of AtPRD1, MTOPVIB and AtSPO11-2 proteins.

(a) The expasy analysis (<http://embnet.vital-it.ch/cgi-bin/COILS>) showed that AtPRD1 had putative coiled-coils domains. For the further interaction assays, the AtPRD1 was divided into five regions: AtPRD1-A (1-388 aa), AtPRD1-B (389-812 aa), AtPRD1-C (813-962 aa), AtPRD1-D (963-1109 aa) and AtPRD1-E (1110-1330 aa). (b) The structural organization of the MTOPVIB and AtSPO11-2 proteins, indicating the two truncated fragments of MTOPVIB: 1-261 aa (Bergerat domain) and 228-493 aa (Transducer domain) and AtSPO11-2: 1-210 aa (CAP domain) and 170-383 aa (Toprim domain) used in the interaction assays.

## Figure S13.

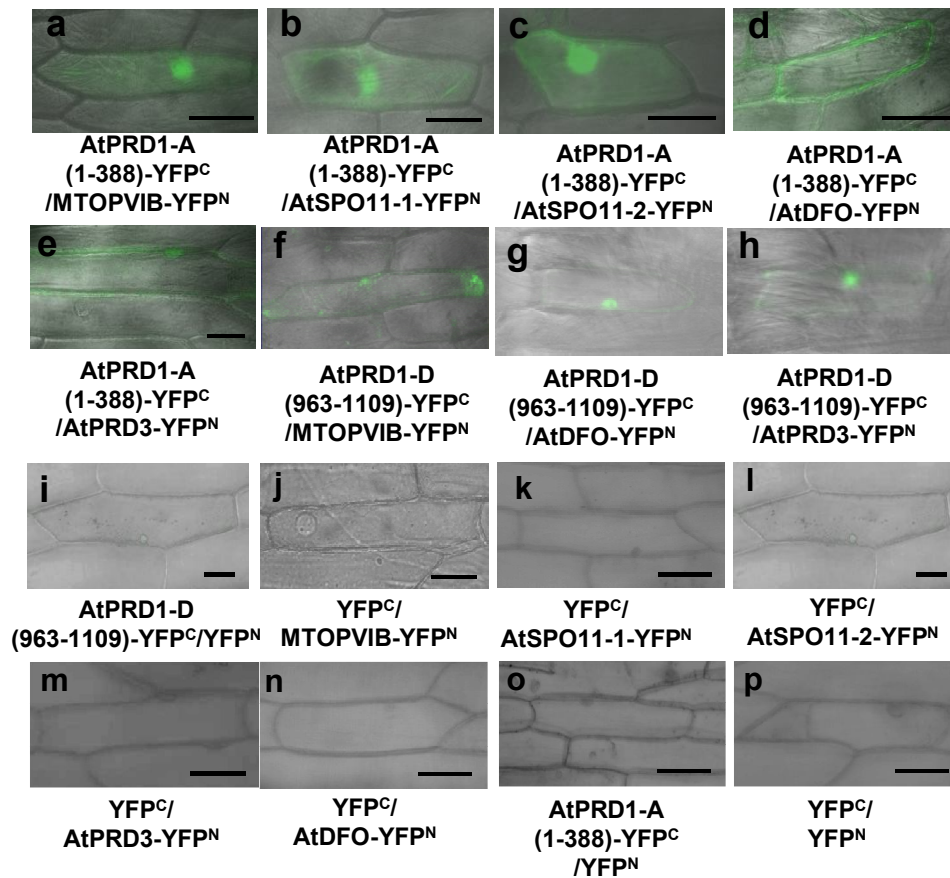

**Figure S13.** BiFC assays for interactions of AtPRD1-A and -D with Topo VI-like complex, AtPRD3, AtDFO in onion epidermal cells.

(a-i) showed that AtPRD1-A (1-388 aa) interacted with MTOPVIB (a), AtSPO11-1 (b), AtSPO11-2 (c), AtDFO (d) and AtPRD3 (e). (f-h) AtPRD1-D (963-1109 aa) interacted with MTOPVIB (f), AtDFO (g) and AtPRD3 (h). (i-p) The negative controls for (a-h). Bars= 50  $\mu$ m.
